1 **Massive RNA editing in ascetosporean mitochondria**

2

3 *Akinori Yabuki*<sup>1,2\*</sup>, *Chihaya Fujii*<sup>1, 2</sup>, *Euki Yazaki*<sup>3</sup>, *Akihiro Tame*<sup>4</sup>, *Keiko Mizuno*<sup>1</sup>, *Yumiko Obayashi*<sup>5</sup>,  
4 *and Yoshitake Takao*<sup>6</sup>

5

6 <sup>1</sup> Japan Agency for Marine-Earth Science and Technology, Yokosuka, Kanagawa 237-0061, Japan

7 <sup>2</sup> Graduate School of Agricultural Science, Tohoku University, Sendai, Miyagi 980-8572 Japan

8 <sup>3</sup> Research Center for Advanced Analysis, National Agriculture and Food Research Organization,  
9 Tsukuba, 305-8518 Japan

10 <sup>4</sup> Marine Works Japan Ltd, Yokosuka, Kanagawa 237-0063, Japan

11 <sup>5</sup> Center for Marine Environmental Studies, Ehime University, Matsuyama, Ehime 790-8577, Japan

12 <sup>6</sup> Department of Marine Science and Technology, Faculty of Marine Science and Technology, Fukui  
13 Prefecture University, Obama, Fukui 917-0003, Japan

14

15 \*Corresponding author:

16 E-mail: [yabukia@jamstec.go.jp](mailto:yabukia@jamstec.go.jp)

17 **Abstract**

18 Ascetosporeans are parasitic protists of invertebrates. As only two species of Mikrocytida, an  
19 ascetosporean subgroup, have ever been sequenced deeply and analyzed using cells isolated from  
20 infected organisms, it was shown that their mitochondria are functionally reduced and the organellar  
21 genome is lacking. However, molecular studies on other ascetosporeans have not been conducted, and  
22 whether reduced mitochondria is common in ascetosporeans remains unclear. In the present study, we  
23 established two cultures of Paradinida, another ascetosporean subgroup, and reconstructed their  
24 mitochondrial genomes. As they were compared with their RNA-seq data, massive A-to-I and C-to-U  
25 types of RNA editing were detected. Many editing sites are shared between two paradinids, but strain-  
26 unique sites also exist. As the mitochondrial genes are involved in the electron transfer system, their  
27 mitochondria are not functionally reduced, unlike that in Mikrocytida. Furthermore, we detected  
28 adenosine deaminase acting on RNA (ADAR), which is a key enzyme of A-to-I substitution, in  
29 paradinids as well as several other protists. Immunostaining showed that this ADAR is specifically  
30 localized in the mitochondria of paradinids, suggesting that A-to-I substitution in paradinid  
31 mitochondria is mediated by ADAR. These findings elucidated the functional diversity and  
32 evolutionary process of ascetosporean mitochondria as well as ADAR.

33

34

## 35 Introduction

36 Ascetosporea (ascetosporeans) is a class of Endomyxa, Rhizaria, and all its species are  
37 parasites of invertebrates. Their cell cultures do not exist, and the life cycle of ascetosporeans is still  
38 unclear<sup>1,2</sup>. As some of their members cause serious damage to aquacultures, they are also important  
39 research targets in fishery sciences<sup>3-5</sup>. While five major groups are recognized in Ascetosporea, only  
40 two species of Mikrocytida have ever been sequenced deeply and analyzed using cells isolated from  
41 infected oysters and crabs<sup>6,7</sup>. Pioneering studies showed that their mitochondria are functionally  
42 reduced to mitochondrion-related-organelles (MRO), and their organellar genomes are lacking.  
43 However, in-depth studies on other ascetosporeans have not been conducted yet, and whether MRO  
44 is common in ascetosporeans as a whole remains unclear.

45 RNA editing is an essential cellular function, resulting in RNA modification. Several types  
46 of RNA editing have been reported, and they play an important role in the alteration of functional  
47 proteins and non-coding RNA<sup>8</sup>. Adenosine-to-inosine (A-to-I) substitution is likely the most studied  
48 form of RNA editing. This type of RNA editing is mediated by adenosine deaminase acting on RNA  
49 (ADAR) in the metazoan nucleus, and ADAR mutations are associated with several diseases in  
50 humans, including prostate cancer and amyotrophic lateral sclerosis<sup>9-11</sup>. The absence of ADAR in the  
51 genomes of fungi and early branching opisthokonts suggests that ADAR evolved from adenosine  
52 deaminase acting on tRNA (ADAT), which is conserved in all eukaryotes derived from the metazoan  
53 ancestor, and then diversified into several subfamilies acquiring several functional motifs and  
54 domains in the metazoan evolution<sup>12</sup>. Although ADAR was exceptionally reported from  
55 *Symbiodinium* spp.<sup>13</sup>, its origin and evolution are poorly understood. A-to-I type of RNA editing has  
56 been reported from the mitochondria of several protists, such as diplomonids,<sup>14,15</sup> and  
57 dinoflagellates<sup>16</sup>; however, their mediating mechanisms were not understood.

58 In the present study, we established clonal cultures of Paradinida, which is another subgroup  
59 of Ascetosporea, and their mitochondrial genomes were sequenced. By analyzing them with their  
60 RNA-seq data, it was revealed that massive RNA editing occur in their mitochondria and they have  
61 ADAR targeting into mitochondria. As the mitochondrial function of Paradinida was predicted not to  
62 be reduced, there is diversity about mitochondrial structure and function in Ascetosporea. Further,  
63 mitochondrial targeting ADAR, which has never been expected, also illuminated the origin and  
64 functional diversity of RNA editing mediated by ADAR.

## 65 Materials and Methods

### 66 *Sample acquisition and culturing*

67 Initial water samples were collected from Tokyo and Suruga Bay (Table S1). A small aliquot  
68 of each sample was added to Hemi medium<sup>17</sup> with a 5- $\mu$ l/ml antibiotic cocktail (P4083, Merck,  
69 Darmstadt, Germany) and incubated under dark conditions at 19–20 °C. From the incubated samples,  
70 cultures of FC901 and SRM-001 were established by isolating a single cell using a glass  
71 micropipette, and the cultures were axenically maintained by inoculation in Hemi medium without  
72 antibiotics at 19–20 °C under dark conditions every two weeks. The absence of contaminating  
73 bacterial cells in the culture (i.e., axenic culture) was confirmed by careful microscopic observation  
74 and PCR using the extracted total DNA with universal bacterial primer set, i.e., 27f<sup>18</sup> and 1492r<sup>19</sup>.

### 75 *Microscopy*

76 Living cells of Paradinida spp. FC901 and SRM-001 were observed under a BX43  
77 microscope (Olympus, Tokyo, Japan) equipped with a digital 4K camera, FLOYD-4K (Wraymer,  
78 Osaka, Japan). For scanning electron microscopy, the axenic cells that grew on a glass slide were  
79 fixed with 2.5% glutaraldehyde in the cultivation medium at 4 °C. The fixed cells were washed with  
80 0.22- $\mu$ m-filtered artificial seawater (FASW; 3.5% Rei-Sea Marine II; Iwaki Co. Ltd., Tokyo, Japan)  
81 and then postfixed with 2.0% osmium tetroxide dissolved in FASW for 2 h. The postfixed cells were  
82 dehydrated using a graded ethanol series, dried with a JCPD-5 critical point drying device (JEOL,  
83 Akishima, Japan), then coated with osmium using an OPC-80 osmium coater (Filgen, Nagoya,  
84

85 Japan). The specimens were imaged using a field-emission scanning electron microscope (Quanta  
86 450 FEG; Thermo Fisher, Waltham, MA) operating at 5 kV.

### 87 **Sequencing analyses**

88 Approximately 200 ml of mid-exponential phase cell cultures of *Paradinida* spp. FC901 and  
89 SRM-001 were centrifuged at  $2,400 \times g$  for 5 min. The cell pellets were frozen and sent to the  
90 sequencing company (Azenta, Tokyo, Japan), and the library reconstruction and sequencing analyses  
91 were conducted using default settings. The details of the analyses and the sequence outputs are  
92 summarized in Table S2.

93 The raw fastq data of DNA-seq were divided into 100 subsets using SeqKit<sup>20</sup>, and three  
94 subsets of each strain were subjected to the contig assembly using SPAdes 3.13<sup>21</sup> with default  
95 settings. From each assembly data, a single possible mitochondrial genomic fragment was detected  
96 by BLASTN using the mitochondrial genome sequence of *Ophirina amphinema* (GenBank accession  
97 number: LC369600.1) as the query sequence. The detected sequences were identical among three  
98 subset analyses of each strain, while the starting position of each sequence differed. By comparing  
99 these sequences, a circular mitochondrial genome of FC901 and SRM-001 was reconstructed. The  
100 same assembly analyses were also conducted using the RNA-seq data. The obtained mitochondrial  
101 sequences, which were reconstructed from RNA-seq data, were subjected to annotation using  
102 MFannot (<https://megasun.bch.umontreal.ca/apps/mfannot/>) and compared with those assembled  
103 from DNA-seq data using Mesquite 3.10<sup>22</sup>.

104 For analyzing the transcriptome data, three RNA-seq datasets of *Paradinida* sp. FC901 were  
105 combined into a single dataset. The fastq data of each strain were subjected to contig assembly using  
106 SPAdes 3.13<sup>21</sup> with the '--rna' option. From the reconstructed contigs, their ADAR and ADAT  
107 sequences were searched by TBLASTN using the ADAR sequence of *Symbiodinium*  
108 *microadriaticum* (OLQ07757; E-value cut-off was set to  $10^{-10}$ ). We also searched publicly available  
109 sequencing data (Table S3) for ADAR and ADAT sequences of other protists using the same  
110 approach. The detected sequences (e.g., ADAR and ADAT of *Phaeodactylum tricornutum*) were also  
111 used as the query in further searches for identifying more ADARs and ADATs. The obtained  
112 sequences were aligned with those of the metazoan ADARs and ADATs and then subjected to  
113 automated alignment using MAFFT v 7.471 with the 'L-INS-' option<sup>23,24</sup>. The aligned sequences  
114 were masked for the phylogenetic analysis using trimAl v1.4 with the 'strict' option<sup>25</sup>. This initial  
115 dataset contained all the detected sequences, including the partial short and highly divergent  
116 sequences, and only 94 positions were included in the phylogenetic analysis. The tree topology and  
117 branch lengths were inferred using the maximum likelihood (ML) methods using IQ-TREE 2.2.0<sup>26</sup>  
118 with the LG+F+I+G4 model. The robustness of the ML phylogenetic tree was evaluated using a non-  
119 parametric ML bootstrap analysis with the LG+F+I+G4 model (100 replicates). We also conducted  
120 Bayesian phylogenetic analysis with the CAT + GTR model using PhyloBayes MPI v. 1.8a<sup>27,28</sup>. The  
121 analysis included two Markov chain Monte Carlo runs of 100,000 cycles with a 'burn-in' of 25,000  
122 cycles. The consensus tree with branch lengths and Bayesian posterior probabilities were calculated  
123 from the remaining trees. Based on these findings, we revised the main dataset, excluding 14 partial  
124 and divergent ADAR sequences from an initial alignment. The main dataset was prepared using the  
125 same method used for the initial dataset and comprised 209 positions. The same methods were used  
126 to infer the phylogenetic tree and statistical support. Of the newly detected ADAR sequences, 12  
127 sequences were retained in the main dataset and were subjected to motif identification by HMMER  
128 3.3 (<http://hmmer.org>) along with the ADAR of *Paradinida* sp. FC901 against the Pfam database<sup>29</sup>.

129 The 18S rRNA gene sequences of *Paradinida* sp. FC901 and SRM-001 were determined  
130 using the DNA that was extracted with Qiagen DNeasy Plant Mini Kit (Qiagen, Hilden, Germany)  
131 from 20 ml of culture. The primers used were Euk1A<sup>30</sup> and EukB<sup>31</sup>. The sequences were added to the  
132 alignment that was created based on the method proposed by Ward *et al.*<sup>32</sup> and aligned using MAFFT  
133 v 7.471 with the default settings. The ML tree with the non-parametric bootstrap analyses of 1,000  
134 replicates and the Bayesian tree were reconstructed using the same methods described earlier<sup>33</sup>.

135 **Western blot analysis**

136 Approximately 200 ml of mid-exponential phase cell culture of *Paradinida* sp. FC901 was  
137 centrifuged at  $2,400 \times g$  for 5 min. The cell pellet was frozen and sent to Genostuff Co. Ltd. (Tokyo,  
138 Japan), where the following experiments were conducted.

139 The frozen cell pellet was homogenized in RIPA buffer (Fujifilm, Osaka, Japan) containing  
140 1/100 (v/v) in a final volume of Protease Inhibitor Cocktail (Merck) for 30 min at 4 °C. After  
141 centrifugation at  $18,000 \times g$  for 5 min at 4 °C; the aqueous phase was recovered and utilized as the  
142 initial protein assay. The volume of the extracted proteins was measured using a BCA Protein Assay  
143 Kit (Thermo Scientific). The proteins (30  $\mu$ g) were mixed with sample buffer (Thermo Scientific)  
144 and Sample Reducing Agent (Thermo Scientific) and then separated by 5% to 20% gradient  
145 polyacrylamide gel electrophoresis. The separated proteins were transferred onto a PVDF membrane  
146 (ATTO, Tokyo, Japan) and blocked for 1 h at room temperature with 0.1% TBST buffer containing  
147 5% skimmed milk powder. The blotted membrane was incubated overnight at 4 °C with a polyclonal  
148 anti-ADAR antibody HPA051519 (Merck) diluted 1:500 with 0.1% TBST containing 5% BSA at  
149 final concentration. The membrane was washed four times in 0.1% TBST buffer and incubated for 1  
150 h at room temperature with anti-rabbit IgG conjugated to HRP-linked antibody #7074 (Cell  
151 Signaling Technology, Danvers, MA) diluted 1:5,000 with 0.05% TBST containing 5% skimmed  
152 milk. After the membrane was rewashed four times in 0.05% TBST buffer, the bound antibodies  
153 were visualized using Immobilon (Merck) and recorded on C-DiGit (LI-COR, Lincoln, NE).

154 **Fluorescence assay**

155 The cells of *Paradinida* spp. FC901 and SRM-001 were fixed with 4% paraformaldehyde in  
156 cultivation medium, centrifuged at  $2,400 \times g$  for 5 min, and then embedded in 1% agarose in FASW.  
157 The cells in the agarose gel were washed with FASW, dehydrated in a graded series of ethanol (30%,  
158 50%, 70%, 90%, and 100%), and embedded in Technovit 8100 resin (Mitsui Chemicals, Tokyo,  
159 Japan) at 4 °C. Semi-thin sections (approximately 1- $\mu$ m-thick) were cut using a glass knife mounted  
160 on an Ultracut S ultra-microtome (Danaher, Washington DC) and collected on a glass slide. The cell  
161 sections were treated with 2% block ace (KAC Ltd., Kyoto, Japan) in  $1 \times$  PBS for 20 min at room  
162 temperature and then incubated with the anti-ADAR antibody HPA051519 (Merck) diluted 1:200  
163 with PBS for 12 h at 37 °C. After incubation, the sections were incubated again with CF565-  
164 conjugated goat anti-rabbit IgG secondary antibody (1:200 dilution in PBS; Nacalai Tesque, Kyoto,  
165 Japan) for 2 h at room temperature and then stained with 1  $\mu$ M Mito View Green solution (Biotium,  
166 Fremont, CA) and 4',6-diamidino-2-phenylindole (DAPI) for 30 and 5 min, respectively. The  
167 sections were observed using a BX-51 light and fluorescence microscope (Olympus) with UV (Ex,  
168 330–385 nm; Em, > 400 nm), FITC (Ex, 470–495 nm; Em, 510–550 nm), and CY3 (Ex, 530–570  
169 nm; Em, 573–648 nm) filter sets for DAPI, antibodies, and Mito View Green, respectively.

170 The living cells of *Paradinida* sp. FC901, as a representative paradinid, were stained with 1  
171  $\mu$ M Mito View Green solution (Biotium) and DAPI on a glass slide for 30 min and 5 min,  
172 respectively, and observed using a BX-51 light and fluorescence microscope with UV and FITC filter  
173 sets.

174

175 **Results and Discussion**

176 ***Paradinid culture, mitochondrial genome, and RNA editing***

177 Two ascetosporean amoebae, namely, *Paradinida* sp. FC901 and *Paradinida* sp. SRM-001  
178 (Fig. 1, Fig. S1, S2), were established as clonal and axenic cultures. They phylogenetically belong to  
179 *Paradinida* (paradinids), Ascetosporea, Rhizaria, in the 18S rRNA gene tree (Fig. 1). All species  
180 belonging to Ascetosporea are known to be parasitic organisms; thus, *Paradinida* sp. FC901 and  
181 SRM-001 may also exhibit parasitism in natural environments, as do other ascetosporean species.  
182 However, any specific details, including their host organism(s), remain unknown. As *Paradinida* spp.  
183 FC901 and SRM-001 are the first ascetosporean cultures, and they are maintained axenically;  
184 substantial progress has been achieved in the process of obtaining data from ascetosporean parasites.



185 By analyzing DNA-sequencing (seq) data, circular mitochondrial genomes were successfully  
186 reconstructed, and their lengths were 23,048 and 20,099 bp in FC901 and SRM-001, respectively  
187 (Fig. 2A). However, the coding regions in their genomes are finely fragmented by many unexpected  
188 stop codons, suggesting that they are either pseudogenes or involved in RNA editing. Hence, to  
189 confirm these possibilities, RNA-seq on both paradinids was conducted, and the obtained data were  
190 compared with DNA-seq data. The results of sequence comparison showed many adenosines and  
191 cytidines were switched to guanosines and uridines in RNA-seq data, respectively (Fig. 2B). As A-  
192 to-I substitution is the most common type of RNA editing and inosine is recognized as guanosine in  
193 reverse transcription, we considered that the paradinids also possess A-to-I substitutions in addition  
194 to C-to-U substitution in their mitochondria. Interestingly, many substitution sites are shared between  
195 FC901 and SRM-001, indicating that many of the editing sites existed previously in their common  
196 ancestor. Nonetheless, several strain-unique editing sites also existed (Fig. 2B), indicating that the  
197 acquisition of additional editing sites still progresses or progressed until just recently. All genes  
198 except *trnH* and *orf179* have editing sites, while the rate of editing varies among the genes (Fig. 2B).  
199 A-to-I substitution is more abundant than C-to-U substitution in all genes and the gene with the  
200 highest rate is *atp9* of SRM-001 (7.89%). The rate in all coding regions is 2.08% in FC901 and  
201 2.37% in SRM-001 (see Supplementary Information; Table S4), which are values comparable to  
202 those of other protists possessing organellar RNA editing<sup>34-37</sup>, but much lower than the highest rate  
203 (12.7%) of a diplomonid *Namystynia karyoxenos*<sup>38</sup>. As any conserved and/or pattern sequences  
204 around the editing sites could not be detected, it is entirely unclear how those sites are specifically  
205 recognized for editing.

206 The gene repertory in the mitochondrial genome of the two paradinids is very similar, but  
207 *nad6* was only detected from SRM-001 (Fig. 2A, C). As only four species of tRNA (i.e., *trnH*, *trnY*,  
208 *trnW*, and *trnM*) are encoded on their mitochondrial genomes, we considered that other tRNA species  
209 were encoded on their nuclear genomes and transported into the mitochondria, as reported in other  
210 protists<sup>e.g., 39-42</sup>. The number of protein-coding genes is 13 in FC901 and 14 in SRM-001, and all of  
211 them have been reported from the mitochondrial genomes of other rhizarians sequenced previously  
212 (Fig. 2C); these genes are all functionally involved in the electron transport chain. Notably, because  
213 the genes coding for proteins seen in complex I, III, IV, and V were detected, we believe that the  
214 mitochondria of paradinids have a normal function to synthesize ATPs, and they are not functionally  
215 reduced to MROs, which is not consistent with that of Mikrocystida<sup>6,7</sup>. The function of acetosporan  
216 mitochondria, including MRO, may be different, lineage by lineage, by the level of adaptation to the  
217 parasitic lifestyle.

### 218 **Detection of ADAR in paradinids and possible origin in LECA**

219 A-to-I and C-to-U substitution types of RNA editing are found in not only protein-coding  
220 genes but also structural genes of paradinids. These types of RNA editing are also reported from  
221 diplomonids<sup>38</sup>, but the editing in the transfer RNAs is unique in paradinids. Since paradinids and  
222 diplomonids are phylogenetically distant from each other, their RNA editing was likely established  
223 independently. The mechanisms involved in RNA editing of diplomonids have not yet been  
224 elucidated, and the roles of key enzymes, i.e., ADAR for A-to-I substitution and APOBEC for C-to-U  
225 substitution, are not understood. By contrast, we successfully detected ADAR sequences from  
226 paradinids using TBLASTX (E-value cut-off was set to  $10^{-10}$ ) with a *Symbiodinium* ADAR sequence  
227 (OLQ07757) as the query. APOBEC was not found in the paradinids investigated in this study.  
228 Furthermore, as we searched for ADAR sequences from the publicly available sequencing data  
229 (Table S3), 28 possible ADAR sequences from 24 protist species in total were detected. Since 14 out  
230 of the 28 sequences were partial and/or highly divergent, their assignment as ADAR is not yet  
231 conclusive. By contrast, the other 14 sequences from 13 protists, including two paradinids, form a  
232 clade with moderate statistical support, while the sister relationship between protistan ADARs and  
233 the metazoan ADARs is not well supported (Fig. 3). In addition to this phylogeny, ADAT can be  
234 found in 7 of 11 protist species that possess ADAR (Table S3). Although the double-strand RNA

235 binding motif, a key motif of metazoan ADARs, is absent from protistan ADARs (Fig. S3), they can  
236 be distinguished from ADAT, and it is reasonable to consider that protistan ADARs belong to the  
237 ADAR family. As the protists possessing ADAR belong to phylogenetically divergent lineages,  
238 ADAR likely evolved much earlier in the history of eukaryotes than previously thought and may  
239 have originated in the LECA. The secondary loss of ADAR possibly occurred independently at the  
240 base of fungi, as fungi do not have ADAR<sup>43</sup>.

#### 241 ***Subcellular localization of paradinid ADAR and its role in mediating mitochondrial RNA editing***

242 It may be reasonable to consider that paradinid ADAR is involved in mitochondrial RNA  
243 editing; however, the specific ADAR in mitochondrion has not been reported to date. All of the  
244 ADAR for which subcellular localization was studied belong to metazoans, and they are all localized  
245 in the nucleus except for a single isoform found in the cytosol. The structures stained by anti-human-  
246 ADAR antibody HPA051519 clearly overlap with the mitochondria stained by MitoView (Fig. 4A-F)  
247 in two paradinids; western blotting analysis was used to study its specificity for the extracted  
248 proteins of FC901 (Fig. S4). The structures stained by MitoView are also consistent with the  
249 distribution pattern of the mitochondria stained by MitoTracker (Fig. S5). These findings are very  
250 consistent with the fact that A-to-I substitutions occur in the mitochondria of paradinids; hence, we  
251 consider these ADARs probably contribute to RNA editing in their mitochondria.

252 The subcellular localization and function of other protistan ADARs remain unclear. Of the  
253 protists possessing ADAR, only dinoflagellates, diplomonads, and paradinids possess A-to-I  
254 substitution in their mitochondrial genes<sup>14-16</sup>. Although the mitochondrial genome of the other  
255 protists that was shown to have ADAR in this study has already been reported<sup>44-46</sup>, the possible  
256 existence of A-to-I substitution in their mitochondria was neither detected nor suggested. Their  
257 ADARs might contribute to the editing of non-coding RNA in their mitochondria; however, it may  
258 be more reasonable to consider that their ADARs function in the nucleus, as do the metazoan  
259 ADARs. Ancestral paradinids' ADAR may also have been localized in the nucleus and then  
260 underwent changes to function in the mitochondrion. As we could not detect ADAR from the nucleus  
261 of paradinids, the original function of ADAR in paradinids' nucleus may have not been crucial.

#### 262 ***Collateralization of life for diversification (COLD) hypothesis explains the advantage of complex mitochondrial RNA editing***

263 The RNA editing in paradinids' mitochondria is very complex with respect to the number of  
264 editing sites. More than 2% of the total coding region is involved in the editing process. If the  
265 mitochondrial genomes only encode proteins that do not require RNA editing, the underlying  
266 processes and molecular machineries for RNA editing are unnecessary. Paradinids rather seem to  
267 have survival constraints in possessing RNA editing; paradinids must keep their organellar editing  
268 function to have operational proteins in their mitochondria. This complex characteristic from which  
269 adaptive advantages cannot be explained may have been established due to constructive neutral  
270 evolution (CNE). CNE posits that complexity can increase for a long period, even if the complexity  
271 itself is neutral or slightly negative for the survival of each organism<sup>47, 48</sup>. However, here, we found  
272 and proposed a possible indirect advantage to possess organellar RNA editing.

273 While organellar RNA editing may be just extra steps for usual gene expression, the protists  
274 possessing it (e.g., diplomonads and paradinids) are distributed with high lineage diversity in oceans  
275 <sup>32,49</sup>. In other words, they succeeded in diversifying, and we can, thus, hypothesize that organellar  
276 RNA editing may have partially contributed to their diversification. Mutations in any kind of genome  
277 always occur with a certain probability. If a lethal mutation occurs in the mitochondrial genome, the  
278 individual carrying such a mutation cannot survive. However, if the organism has RNA editing  
279 activity in the mitochondria and can mitigate the effects of such lethal mutations by RNA editing,  
280 then such mutations may not be lethal. In the case of paradinids, some mutations, which are lethal  
281 and involved in the substitution of adenosines or cytidines from other nucleotides, can be masked by  
282 RNA editing activity. Although that organism must keep the RNA editing function for survival, the  
283  
284

285 lethal mutation in the mitochondrial genome is less of a constraint factor for the survival and  
286 diversification of that organism and its descendants. However, as the constraint on the mutation gets  
287 relaxed in the organismal lineage, the complexity (i.e., the number of editing sites) continues to  
288 increase, and it is impossible to return to the original non-complex state. Until the day when the  
289 complexity reaches a limitation, RNA editing can mask some of the lethal mutations in the  
290 mitochondrial genome and help organismal diversification. However, when the complexity reaches a  
291 plateau and the RNA molecules cannot be modified by the existing mechanisms, the organisms  
292 cannot survive any longer. In other words, the organisms possessing the organellar RNA editing may  
293 have some advantage for diversification instead of stocking the potential risk for future extinction  
294 (Fig. 5). Here, we propose this evolutionary scenario as the COLD hypothesis. The COLD  
295 hypothesis is based on CNE but differs from CNE as an adaptive indirect advantage is found in a  
296 limited time. Although the corrective function of RNA editing was also indicated in the previous  
297 studies <sup>e.g., 37</sup>, the link between its function and organismal diversification has not been discussed. In  
298 the long history of this planet, the diversification and extinction of various organisms have occurred  
299 continuously, and some of these events might be explained by the COLD hypothesis.

300

### 301 **Data availability**

302 Mitochondrial genomes for *Paradinida* spp. FC901 and SRM-001 are available under GenBank  
303 accession numbers LC733240 and LC733241, respectively. The raw sequencing data for genome  
304 reconstruction and confirmation of RNA editing is available under GenBank BioProject accession  
305 number PRJDB14367. Their 18S rRNA gene sequences are available under GenBank accession  
306 numbers LC730879 (FC901) and LC730880 (SRM-001). The ADAR sequences that were newly  
307 detected and analyzed in this study as well as the datasets, can be found in online repositories, Dryad  
308 <https://doi.org/10.5061/dryad.mcvdnc4z>.

309

### 310 **Funding**

311 This work was supported by the Japan Society for the Promotion of Science (20K06792 and to A.Y.).

312

### 313 **Acknowledgments**

314 We thank the Captain and crew of R/V Hokuto (Tokai University) and all the members of the  
315 SURUME (Suruga Bay Research for Understanding Marine Ecosystem) Project for their kind  
316 support on sampling.

317

### 318 **Conflict of interest**

319 The authors declare no conflict of interests.

320

### 321 **References**

- 322 1. Bass,D., Ward,G.M. and Burki,F. (2019) Ascetosporea. *Curr. Biol.*, 29, R7-R8.
- 323 2. Biard,T. (2023) Rhizaria. In eLS, John Wiley & Sons, Ltd. (Ed.).
- 324 3. Mourton,C., Boulo,V., Chagot,D., Hervio,D., Bachere,E., Mialhe,E., and Grizel,H. (1992)  
325 Interactions between *Bonamia ostreae* (protozoa: ascetosporea) and hemocytes of *Ostrea edulis*  
326 and *Crassostrea gigas* (Mollusca: bivalvia): *in vitro* system establishment. *J. Invertebr. Pathol.*,  
327 59, 235-240.
- 328 4. Hartikainen,H., Ashford,O.S., Berney,C., Okamura,B., Feist,S.W., Baker-Austin,C.,  
329 Stentiford,G.D. and Bass,D. (2013) Lineage-specific molecular probing reveals novel diversity  
330 and ecological partitioning of haplosporidians. *ISME J.*, 8, 177-186.
- 331 5. Hartikainen,H., Stentiford,G.D., Bateman,K.S., Berney,C., Feist,S.W., Longshaw,M.,  
332 Okamura,B., Stone,D., Ward,G., Wood,C., et al. (2014) Mikrocytids are a broadly distributed  
333 and divergent radiation of parasites in aquatic invertebrates. *Curr. Biol.*, 24, 807-812.



- 334 6. Burki,F., Corradi,N., Sierra,R., Pawlowski,J., Meyer,G.R., Abbott,C.L. and Keeling,P.J. (2013)  
335 Phylogenomics of the intracellular parasite *Mikrocytos mackini* reveals evidence for a mitosome  
336 in rhizaria. *Curr. Biol.*, 23, 1541-1547.
- 337 7. Onuț-Brännström,I., Stairs,C.W., Campos,K.I.A., Thorén,M.H., Ettema,T.J., Keeling,P.J.,  
338 Bass,D. and Burki,F. (2023) A mitosome with distinct metabolism in the uncultured protist  
339 parasite *Paramikrocytos canceri* (Rhizaria, Ascetosporea). *Genome Biol. Evol.*, 15, evad022.
- 340 8. Eisenberg,E. and Levanon,E.Y. (2018) A-to-I RNA editing—immune protector and  
341 transcriptome diversifier. *Nat. Rev. Genet.*, 19, 473-490.
- 342 9. Mannion,N., Arieti,F., Gallo,A., Keegan,L.P. and O’Connell,M.A. (2015) New insights into the  
343 biological role of mammalian ADARs; the RNA editing proteins. *Biomolecules* 5, 2338-2362.
- 344 10. Savva,Y.A., Rieder,L.E. and Reenan,R.A. (2012) The ADAR protein family. *Genome Biol.*, 13,  
345 252.
- 346 11. Grice,L.F. and Degan,B.M. (2015) The origin of the ADAR gene family and animal RNA  
347 editing. *BMC Evol. Biol.*, 15, 4.
- 348 12. Gott,J.M. and Emeson,R.B. (2000) Functions and mechanisms of RNA editing. *Annu. Rev.*  
349 *Genet.*, 34, 499-531.
- 350 13. Liew,Y.J., Li,Y., Baumgarten,S., Voolstra,C.R. and Aranda,M. (2017) Condition-specific RNA  
351 editing in the coral symbiont *Symbiodinium microadriaticum*. *PLOS Genet.*, 13, e1006619.
- 352 14. Moreira,S., Valach,M., Aoulad-Aissa,M., Otto,C. and Burger,G. (2016) Novel modes of RNA  
353 editing in mitochondria. *Nucleic Acids Res.*, 44, 4907-4919.
- 354 15. Yabuki,A., Tanifuji,G., Kusaka,C., Takishita,K. and Fujikura,K. (2016) Hyper-eccentric  
355 structural genes in the mitochondrial genome of the algal parasite *Hemistasia phaeocysticola*.  
356 *Genome Biol. Evol.*, 8, 2870-2878.
- 357 16. Lin,S., Zhang,H. and Gray,M.W. (2008) RNA editing in dinoflagellates and its implications for  
358 the evolutionary history of the editing machinery. *RNA DNA Edit.: Mol. Mech. Integr. Biol.*  
359 *Syst.*, 280-309.
- 360 17. Tashyreva,D., Prokopchuk,G., Yabuki,A., Kaur,B., Faktorová,D., Votýpka,J., Kusaka,C.,  
361 Fujikura,K., Shiratori,T., Ishida, K.-I., et al. (2018) Phylogeny and morphology of new  
362 diplomids from Japan. *Protist*, 169, 158-179.
- 363 18. Lane,D.J. (1991) 16S/23S rRNA sequencing. *Nucleic Acid Tech. Bacterial Syst.*, 115-175.
- 364 19. Edwards,U., Rogall,T., Blöcker,H., Emde,M. and Böttger,E.C. (1989) Isolation and direct  
365 complete nucleotide determination of entire genes. Characterization of a gene coding for 16S  
366 ribosomal RNA. *Nucleic Acids Res.*, 17, 7843-7853.
- 367 20. Shen,W., Le,S., Li,Y. and Hu,F. (2016) SeqKit: a cross-platform and ultrafast toolkit for  
368 FASTA/Q file manipulation. *Plos One*, 11, e0163962.
- 369 21. Bankevich,A., Nurk,S., Antipov,D., Gurevich,A.A., Dvorkin,M., Kulikov,A.S., Lesin,V.M.,  
370 Nikolenko,S.I., Pham,S., Prjibelski,A.D., et al. (2012) SPAdes: a new genome assembly  
371 algorithm and its applications to single-cell sequencing. *J. Comput. Biol.*, 19, 455-477.
- 372 22. Maddison,W.P. and Maddison,D.R. (2011) Mesquite: a Modular System for Evolutionary  
373 Analysis. Version 2.75. <http://mesquiteproject.org>.
- 374 23. Katoh,K., Misawa,K., Kuma,K.I. and Miyata,T. (2002) MAFFT: a novel method for rapid  
375 multiple sequence alignment based on fast Fourier transform. *Nucleic Acids Res.*, 30, 3059-  
376 3066.
- 377 24. Katoh,K. and Standley,D.M. (2014) MAFFT: iterative refinement and additional methods.  
378 *Methods Mol. Biol.*, 1079, 131-146.
- 379 25. Capella-Gutiérrez,S., Silla-Martínez,J.M. and Gabaldón,T. (2009) trimAl: a tool for automated  
380 alignment trimming in large-scale phylogenetic analyses. *Bioinformatics*, 25, 1972-1973.
- 381 26. Nguyen,L.T., Schmidt,H.A., Von Haeseler,A. and Minh,B.Q. (2015) IQ-TREE: a fast and  
382 effective stochastic algorithm for estimating maximum-likelihood phylogenies. *Mol. Biol. Evol.*,  
383 32, 268-274.

- 384 27. Lartillot,N. and Philippe,H. (2004) A Bayesian mixture model for across-site heterogeneities in  
385 the amino-acid replacement process. *Mol. Biol. Evol.*, 21, 1095-1109.
- 386 28. Lartillot,N., Rodrigue,N., Stubbs,D. and Richer,J. (2013) PhyloBayes MPI: phylogenetic  
387 reconstruction with infinite mixtures of profiles in a parallel environment. *Syst. Biol.*, 62, 611-  
388 615.
- 389 29. Mistr,J., Chuguransky,S., Williams,L., Qureshi,M., Salazar,G.A., Sonnhammer,E.L.L.,  
390 Tosatto,S.C.E., Paladin,L., Raj,S., Richardson,L.J., et al. (2021) Pfam: the protein families  
391 database in 2021. *Nucleic Acids Res.*, 49, D412-D419.
- 392 30. Sogin,M.L. and Gunderson,J.H. (1987) Structural diversity of eukaryotic small subunit  
393 ribosomal RNAs. Evolutionary implications. *Ann. N. Y. Acad. Sci.*, 503, 125-139.
- 394 31. Medlin,L., Elwood,H.J., Stickel,S. and Sogin,M.L. (1988) The characterization of enzymatically  
395 amplified eukaryotic 16S-like rRNA-coding regions. *Gene*, 71, 491-499.
- 396 32. Ward,G.M., Neuhauser,S., Groben,R., Ciaghi,S., Berney,C., Romac,S., Bass,D. (2018)  
397 Environmental sequencing fills the gap between parasitic haplosporidians and free-living giant  
398 amoebae. *J. Eukaryot. Microbiol.*, 65, 574-586.
- 399 33. Yabuki,A., Tame,A. and Mizuno,K. (2022) *Podomonas kaiyoae* n. sp., a novel apusomonad  
400 growing axenically. *J. Eukaryot. Microbiol.*, e12946.
- 401 34. Bundschuh,R., Altmüller,J., Becker,C., Nürnberg,P. and Gott,J.M. (2011) Complete  
402 characterization of the edited transcriptome of the mitochondrion of *Physarum polycephalum*  
403 using deep sequencing of RNA. *Nucleic Acids Res.*, 39, 6044-6055.
- 404 35. Grewe,F., Herres,S., Viehöver,P., Polsakiewicz,M., Weisshaar,B. and Knoop,V. (2011) A unique  
405 transcriptome: 1782 positions of RNA editing alter 1406 codon identities in mitochondrial  
406 mRNAs of the lycophyte *Isoetes engelmannii*. *Nucleic Acids Res.*, 39, 2890-2902.
- 407 36. Oldenkott,B., Yamaguchi,K., Tsuji-Tsukinoki,S., Knie,N. and Knoop,V. (2014) Chloroplast RNA  
408 editing going extreme: more than 3400 events of C-to-U editing in the chloroplast transcriptome  
409 of the lycophyte *Selaginella 10ncinate*. *RNA*, 20, 1499-1506.
- 410 37. Klinger,C.M., Paoli,L., Newby,R.J., Wang,M.Y.-W., Carroll,H.D., Leblond,J.D., Howe,C.J.,  
411 Dacks,J.B., Bowler,C., Cahoon,A.B., et al. (2018) Plastid transcript editing across dinoflagellate  
412 lineages shows lineage-specific application but conserved trends. *Genome Biol. Evol.*, 10, 1019-  
413 1038.
- 414 38. Kaur,B., Záhonová,K., Valach,M., Faktorová,D., Prokopchuk,G., Burger,G., Lukeš,J. (2020)  
415 Gene fragmentation and RNA editing without borders: eccentric mitochondrial genomes of  
416 diplomids. *Nucleic Acids Res.*, 48, 2694-2708.
- 417 39. Gray,M.W., Lang,B.F., Cedergren,R., Golding,G.B., Lemieux,C., Sankoff,D., Turmel,M.,  
418 Brossard,N., Delage,E., Littlejohn, T.G., et al. (1998) Genome structure and gene content in  
419 protist mitochondrial DNAs. *Nucleic Acids Res.*, 26, 865-878.
- 420 40. Tan,T.H.P., Pach,R., Crausaz,A., Ivens,A. and Schneider,A. (2002) tRNAs in *Trypanosoma*  
421 *brucei*: genomic organization, expression, and mitochondrial import. *Mol. Cell. Biol.*, 22, 3707-  
422 3717.
- 423 41. Kolesnikova,O.A., Entelis,N.S., Jacquin-Becker,C., Goltzene,F., Chrzanowska-  
424 Lightowers,Z.M., Lightowers,R.N., Martin,R.P., Tarassov,I. (2004) Nuclear DNA-encoded  
425 tRNAs targeted into mitochondria can rescue a mitochondrial DNA mutation associated with the  
426 MERRF syndrome in cultured human cells. *Hum. Mol. Genet.*, 13, 2519-2534.
- 427 42. Lang,B.F. (2018) Mitochondrial genomes in fungi. in *Molecular Life Sciences* (eds Wells, R.D.,  
428 Bond, J.S., Klinman, J. and Masters, B.S.S.) pp. 722-728 (New York, Springer).
- 429 43. Teiche,I. (2020) Fungal RNA editing: who, when, and why? *Appl. Microbiol. Biotechnol.*, 104,  
430 5689-5695.
- 431 44. Oudot-Le Secq,M.P. and Green,B.R. (2011) Complex repeat structures and novel features in the mitochondrial  
432 genomes of the diatoms *Phaeodactylum tricorutum* and *Thalassiosira pseudonana*. *Gene*, 476,20-26.
- 433 45. Oliver,A., Podell,S., Pinowska,A., Traller,J.C., Smith,S.R., McClure,R., Beliaev,A.,

- 434 Bohutskyi,P., Hill,E.A., Rabines,A., et al. (2021) Diploid genomic architecture of *Nitzschia*  
435 *inconspicua*, an elite biomass production diatom. Sci. Rep., 11, 15592.
- 436 46. Hulatt,C.J., Wijffels,R.H., Viswanath,K. and Posewitz,M.C. (2020) The complete mitogenome  
437 and plastome of the haptophyte *Pavlova lutheri* NIVA-4/92. Mitochondrial DNA B Resour., 5,  
438 2748-2749.
- 439 47. Stoltzfus,A. (1999) On the possibility of constructive neutral evolution. J. Mol. Evol., 49, 169-  
440 181.
- 441 48. Muñoz-Gómez,S.A., Biloliar,G., Wideman,J.G. and Geiler-Samerotte,K. (2021) Constructive  
442 neutral evolution 20 years later. J. Mol. Evol., 89, 172-182.
- 443 49. Lukeš,J., Flegontova,O. and Horák,A. (2015) Diplonemids. Curr. Biol., 25, R702-R704.  
444  
445  
446

447 **Figure legends**

448 **Figure 1.** Phylogenetic tree of endomyxean 18S rRNA gene sequences with light microscopic  
449 images of *Paradinida* spp. FC901 and SRM-001. Only maximum likelihood (ML) bootstrap values >  
450 50% are shown. The branches supported by > 0.95 of Bayesian posterior probability are shown in  
451 bold lines.

452  
453 **Figure 2.** Summary of mitochondrial genome of FC901 and SRM-001 **A.** The mitochondrial genome  
454 map of *Paradinida* spp. FC901 and SRM-001. Protein-coding regions are shown in pale blue.  
455 Transfer RNA genes and other structural RNA genes (i.e., *rns* and *rnl*) are shown in green and gray,  
456 respectively. **B.** Summary of the RNA editing found in the mitochondria of FC901 and SRM-001.  
457 The left bars indicate the editing rate of each gene detected on the mitochondrial genome of FC901  
458 and SRM-001. Blue, orange, gray, and yellow bars indicate the rate of A-to-I substitution in FC901  
459 and SRM001 and the rate of C-to-U substitution in FC901 and SRM-001, respectively. Right-side  
460 bars indicate the length of each gene, and the editing sites are indicated by red (A-to-I substitution)  
461 or green (C-to-U substitution) vertical lines. The editing sites shared by FC901 and SRM-001 are  
462 indicated by the single connecting lines. **C.** Venn diagram summarizing the protein-coding genes on  
463 the mitochondrial genomes of related rhizarians. Only *nad6* is absent on the mitochondrial genome  
464 of FC901 but exists on that of SRM-001.

465  
466 **Figure 3.** Phylogenetic tree of eukaryotic adenosine deaminase acting on RNA (ADAR) rooted with  
467 eukaryotic adenosine deaminase acting on tRNA (ADAT).  
468 The maximum likelihood (ML) trees inferred from ADAR–ADAT alignments are shown. ADAT  
469 sequences (and branches) are brown. Metazoan ADAR is blue, and protistan ADAR is light green.  
470 Only ML bootstrap values/Bayesian posterior probabilities equal to or > 50%/0.90 are shown.

471  
472 **Figure 4.** Subcellular localization of paradinid’s ADAR. **A-F:** FC901, **G-L:** SRM-001. Cell sections  
473 are stained by DAPI (**A, G**), anti-ADAR antibody (**B, H**) and Mito View (**C, I**). Differential  
474 interference contrast image of cell sections (**F, L**). **D.** Merged view of Fig. 4A–C. **E.** Merged view of  
475 Fig. 4A–C and F. **J.** Merged view of Fig. 4G–I. **K.** Merged view of Fig. 4G–I and L. Bars = 10  $\mu$ m.

476  
477 **Figure 5.** Schematic summary of the COLD hypothesis. LECA, last eukaryotic common ancestor;  
478 LCAE last common ancestor of endomyxeans; LCAP, last common ancestor of paradinids. White  
479 circles indicate the occurrence of a lethal mutation in the mitochondrial genome.

480

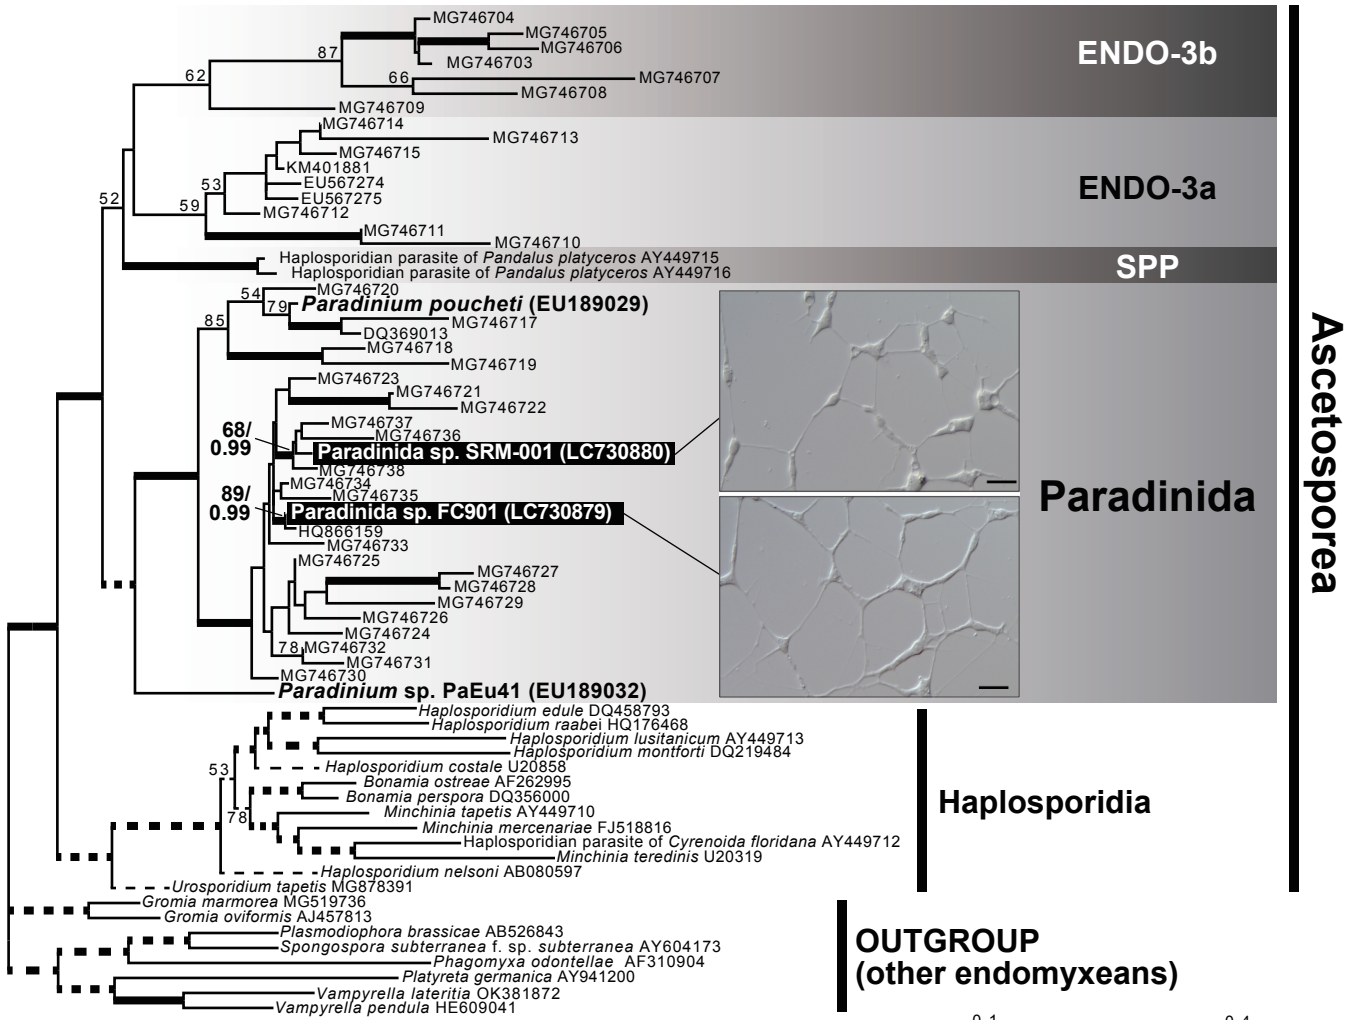





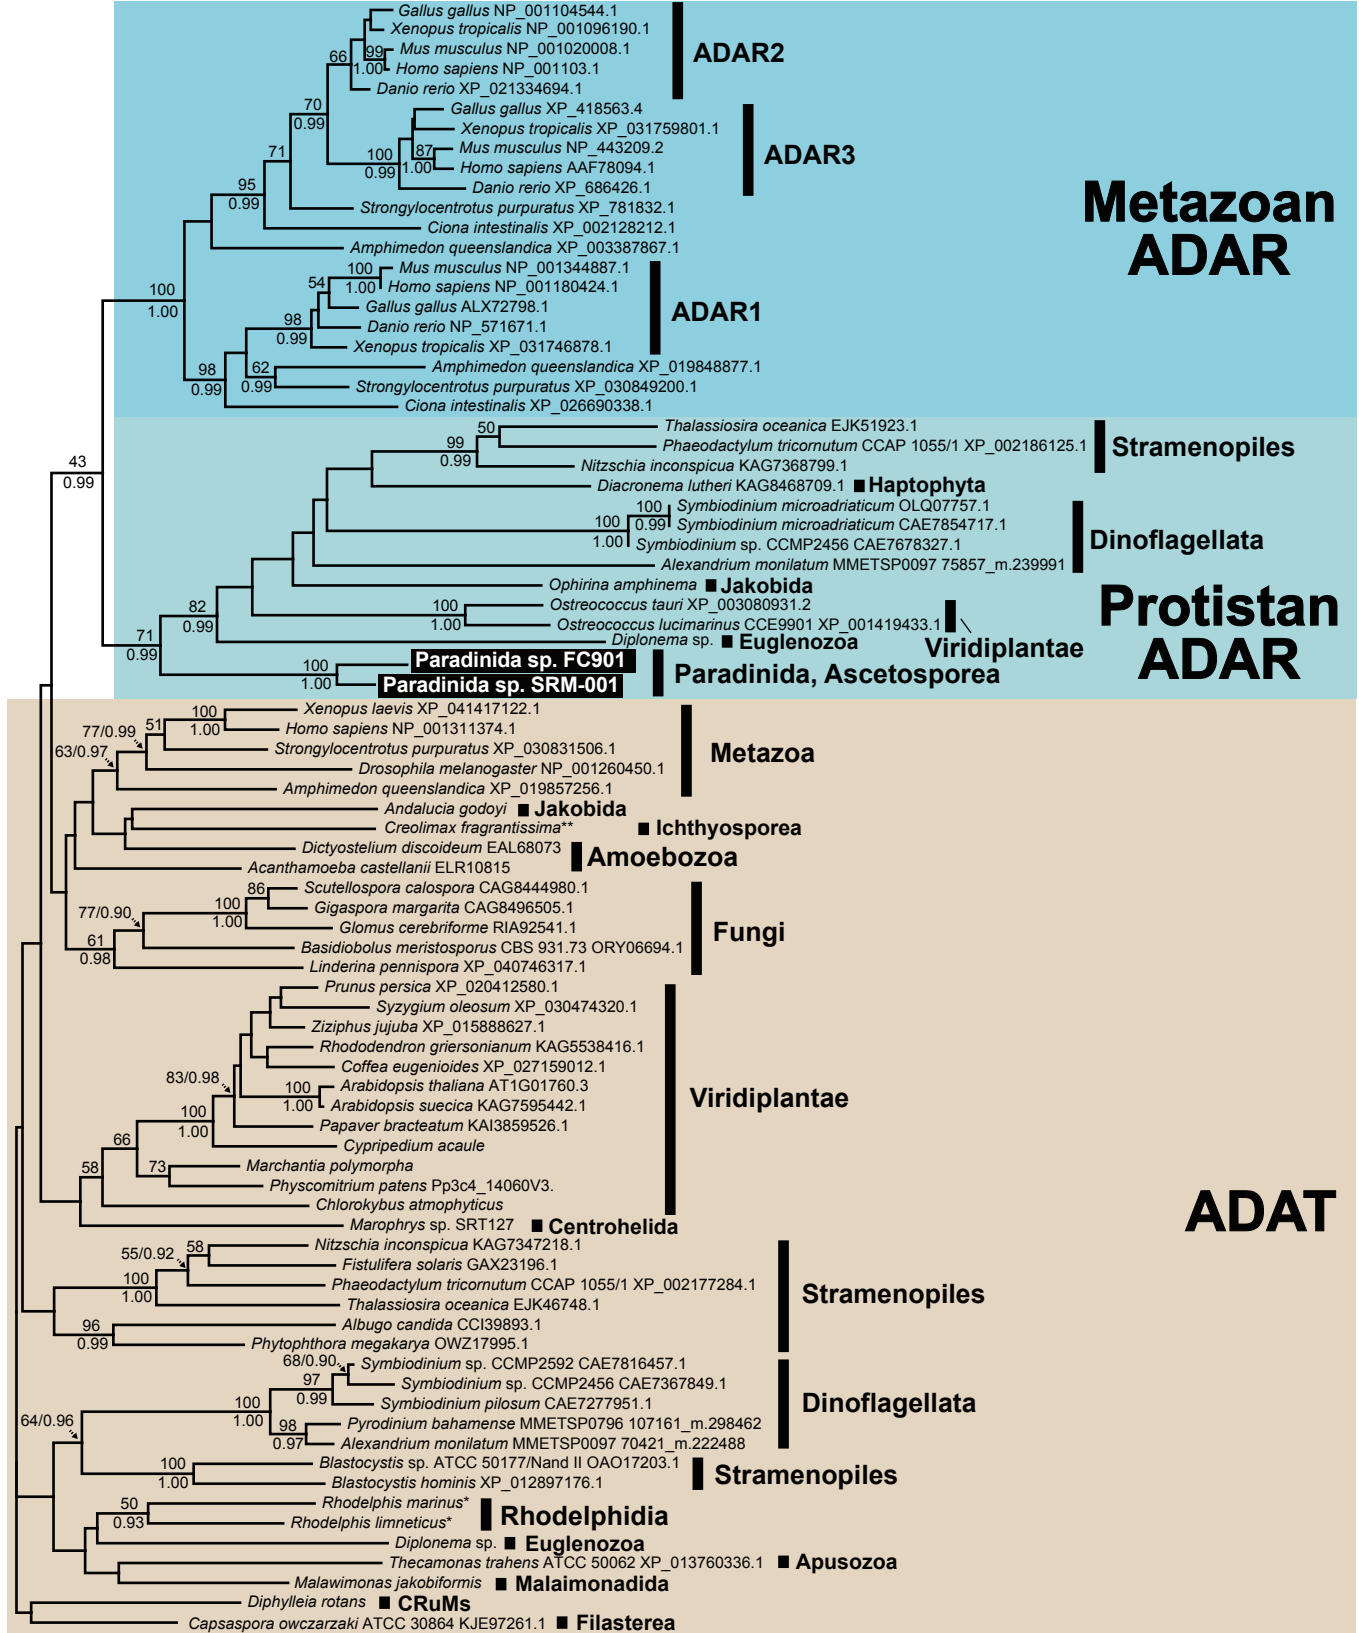

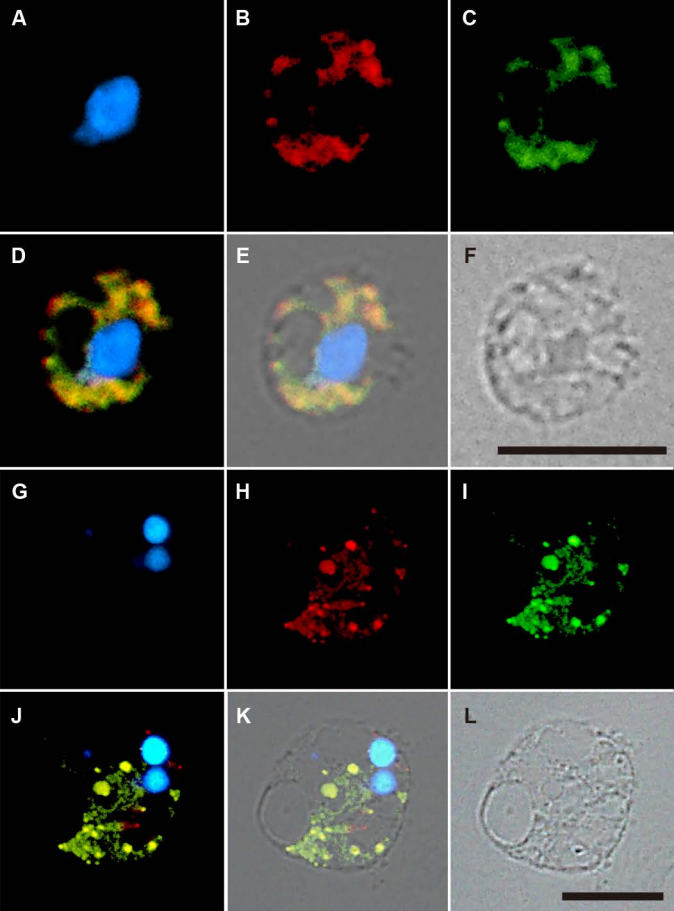

LECA

Lethal mutation  
in the mitochondrial genome

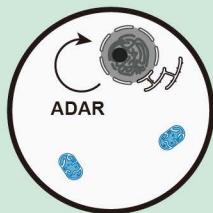

ADAR had function in the nucleus and/or cytosol.

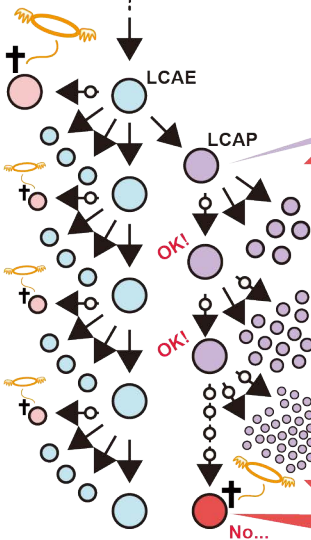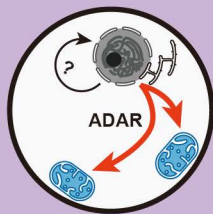

ADAR was targeted into the mitochondria and lethal substitution got masked.

Accelerated diversification,  
instead of stocking potential risks

Complexity increases until  
the limit of mediation.

When too many substitution  
cannot be mediated, the cell  
cannot survive any longer.
